# Supplementary material for: A Novel Olfactory Self-Test Effectively Screens for COVID-19
Source: bioRxiv or medRxiv preprint supplement (doi:10.1101/2021.02.18.21251422), 2021-02-26
Supplement: Supplementary file [file media-1.pdf]

**Extended Data Table 1**

| Category 1                   | Category 2    | Category 3              | Category 4               | Category 5             |
|------------------------------|---------------|-------------------------|--------------------------|------------------------|
| Vanilla extract              | Peanut butter | Mustard (Dijon)         | Garlic (freshly chopped) | Your toothpaste        |
| Nutella                      | Coconut oil   | Vinegar (white)         | Camembert cheese         | Your hand soap         |
| Honey                        | Olive oil     | Horseradish (jar)       | Canned tune              | Your laundry detergent |
| Strawberry jam               | Basil         | Wasabi                  | Blue cheese              | Your shampoo           |
| Apricot jam                  | Oregano       | Onion (freshly chopped) | Canned sardines          | Your hand cream        |
| Apple juice (not fresh)      | Parsley       | Vinegar (apple)         | Mushrooms                | Your body lotion       |
| Orange juice (not fresh)     | Cilantro      | Black pepper (ground)   | Boiled egg               | Your perfume           |
| Lemonade (not fresh)         | Dill          | Menthol gum             | Pickled herring          | Your hand sanitizer    |
| Peach nectar (not fresh)     | Cardamom      | Mint (fresh)            | Cumin                    | Your sunscreen         |
| Pear nectar (not fresh)      | Thyme         | Mint (gum)              | Soy sauce                | Your baby oil          |
| Grapefruit juice (not fresh) | Nutmeg        | Mint (tea)              | Sauerkraut               |                        |
| Pineapple juice (not fresh)  | Caraway       | Sesame oil              | Coffee (ground)          |                        |
| Banana nectar (not fresh)    | Bay leaves    | Vodka                   | Coffee (instant)         |                        |
| Cinnamon                     | Ketchup       | Clove                   | Tea (black)              |                        |
| Maple syrup                  |               | Vinegar (balsamic)      | Tea (earl gray)          |                        |
|                              |               | Vinegar (red)           |                          |                        |
|                              |               | Mustard (ordinary)      |                          |                        |
